# Supplementary material
Source: publisher figshare collection journal article supplement (https://karger.figshare.com/articles/dataset/_/19754719)

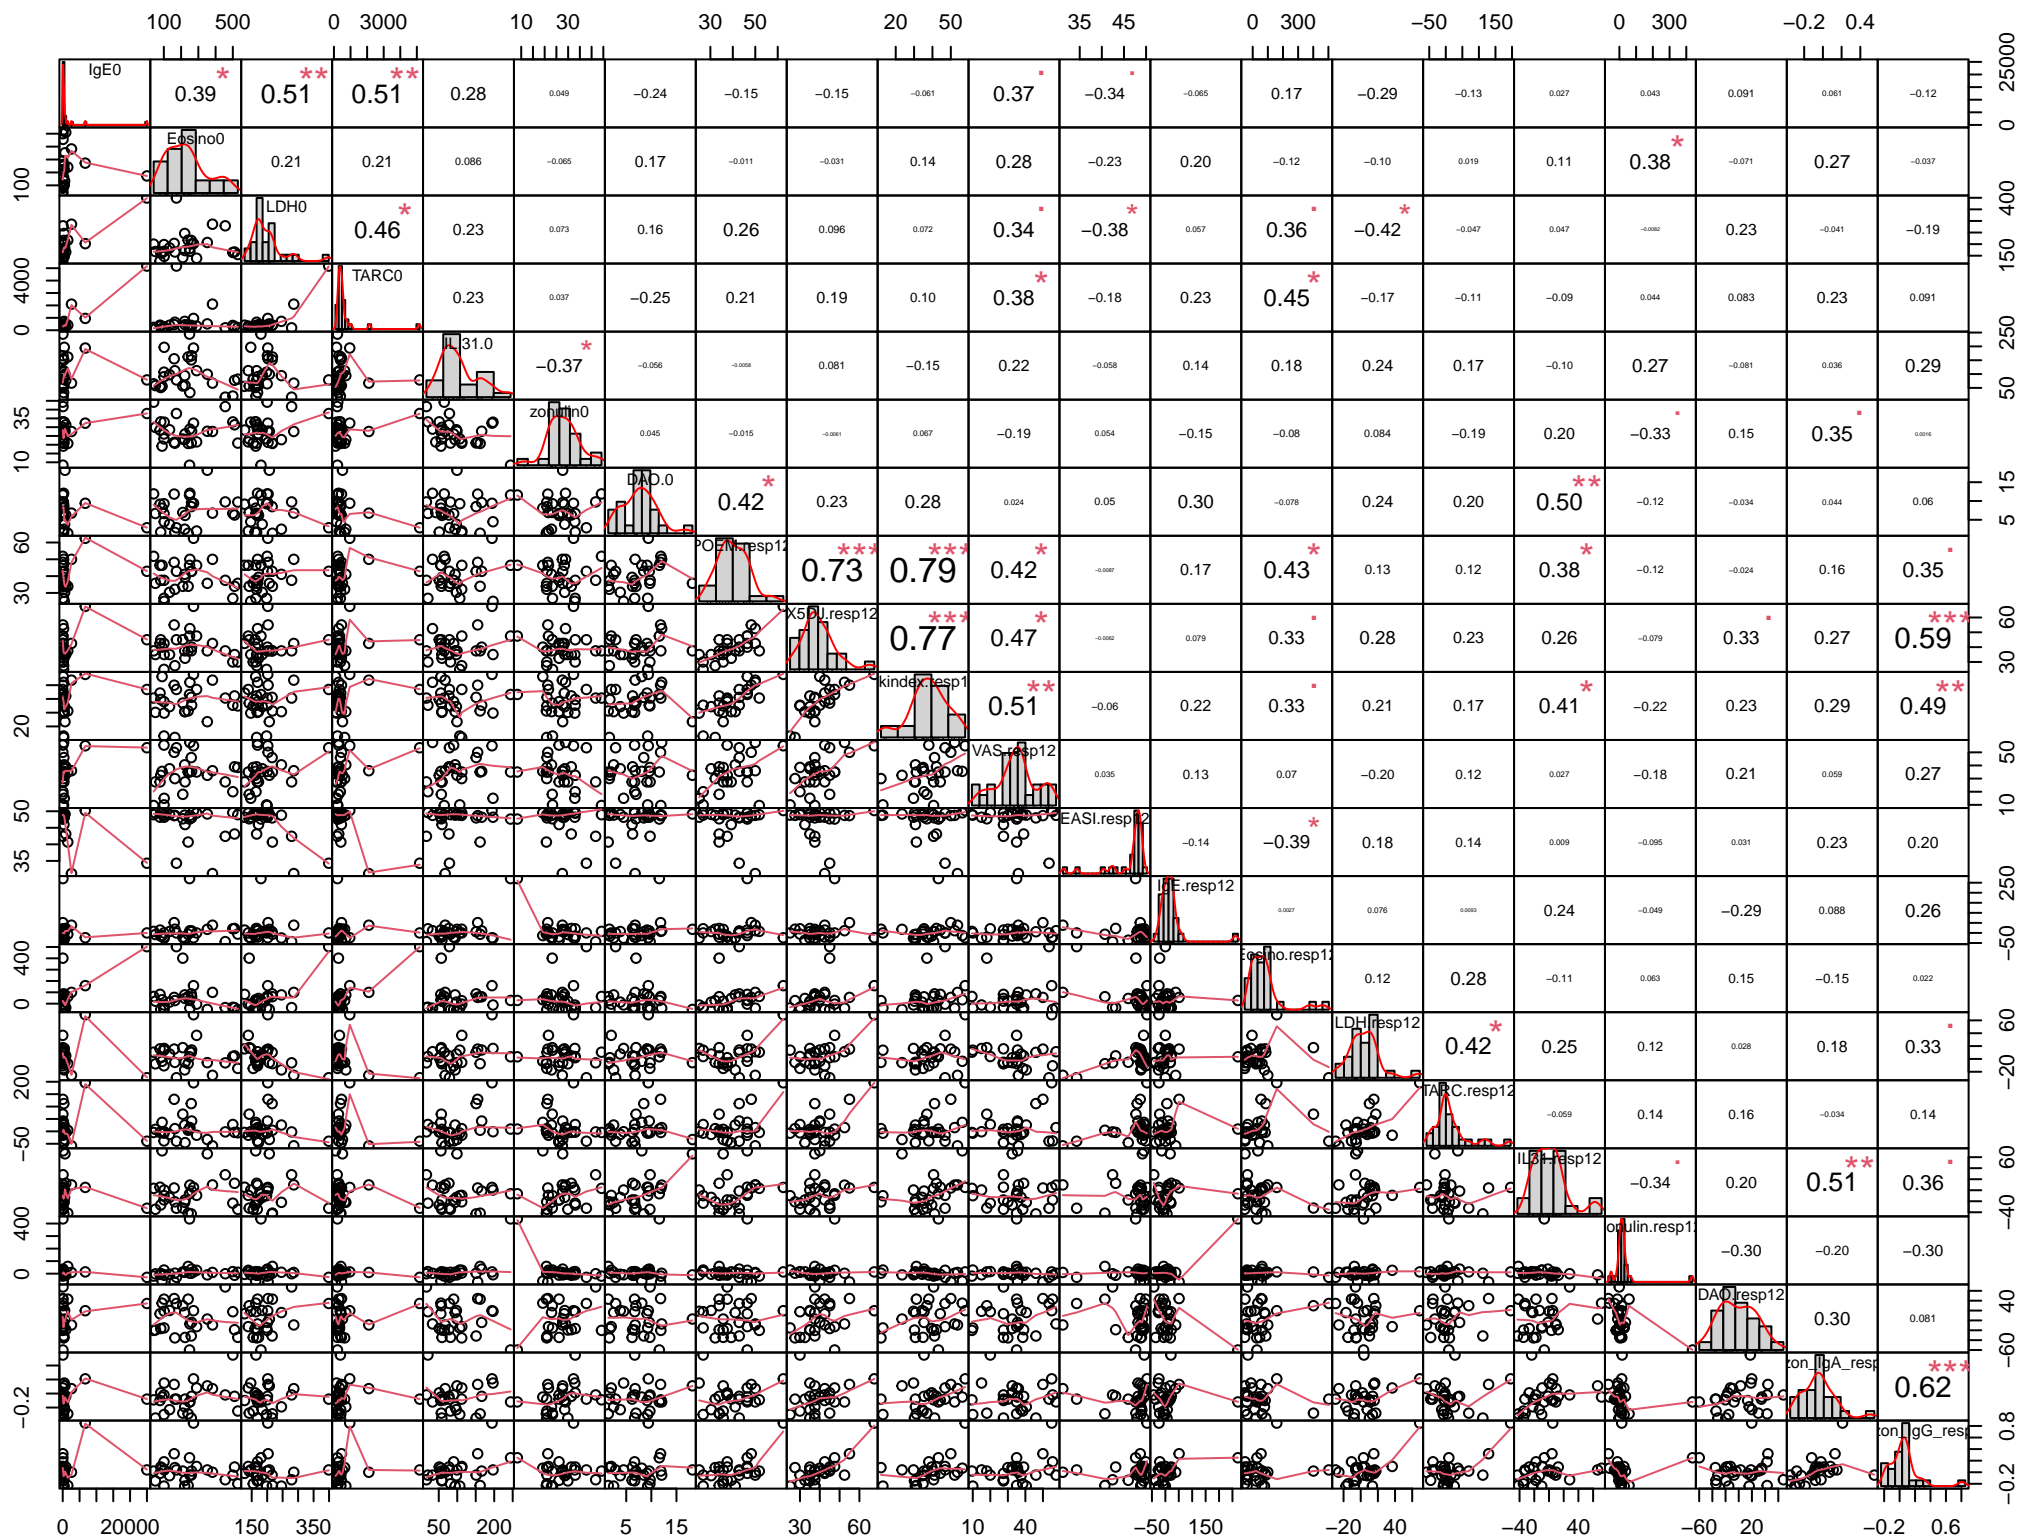

Supplement: Supplementary file 1 [file 1]

VAS (max = 100)

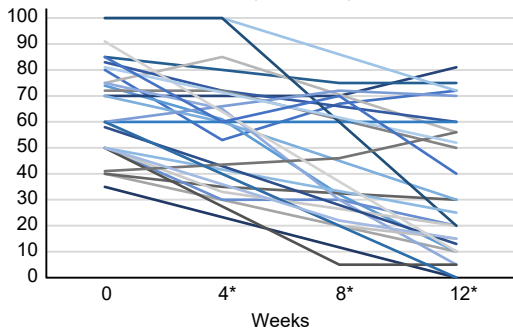

Skindex-16 total score (max = 96)

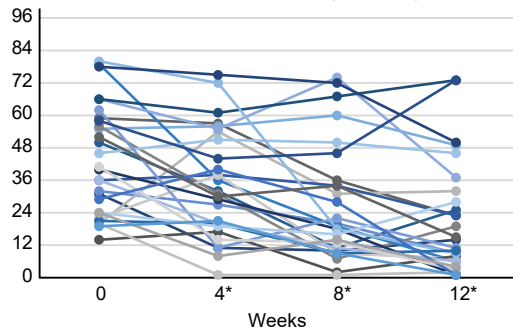

POEM total score (max = 28)

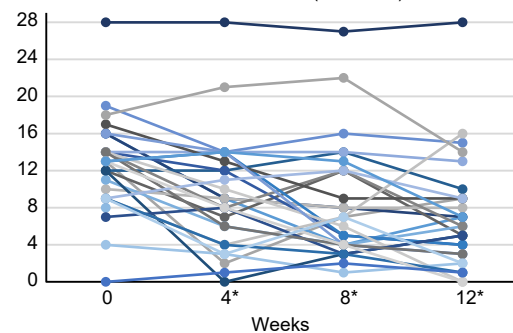

5D total score (max = 25)

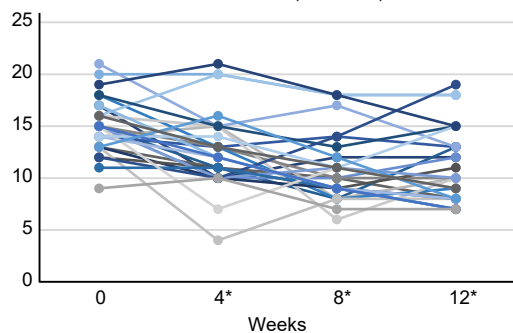

Supplement: Supplementary file 2 [file 1]

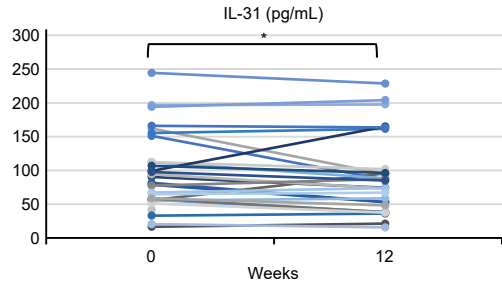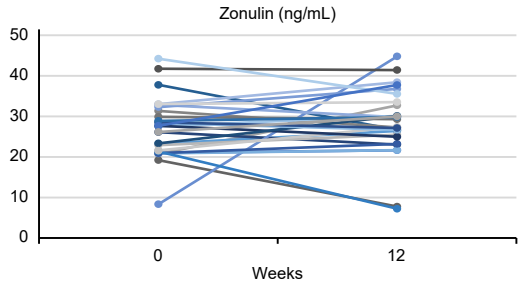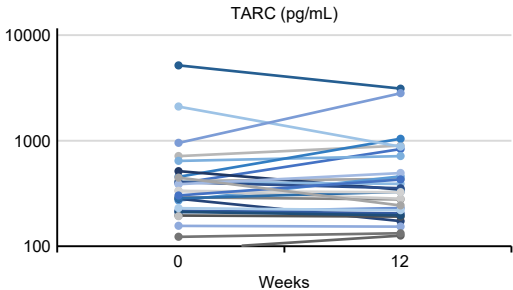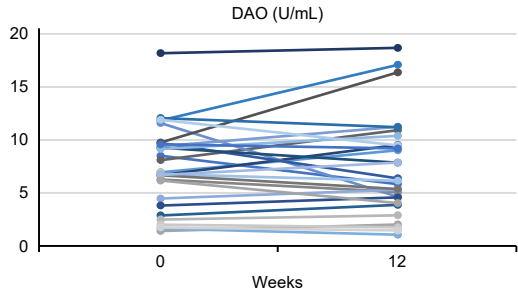

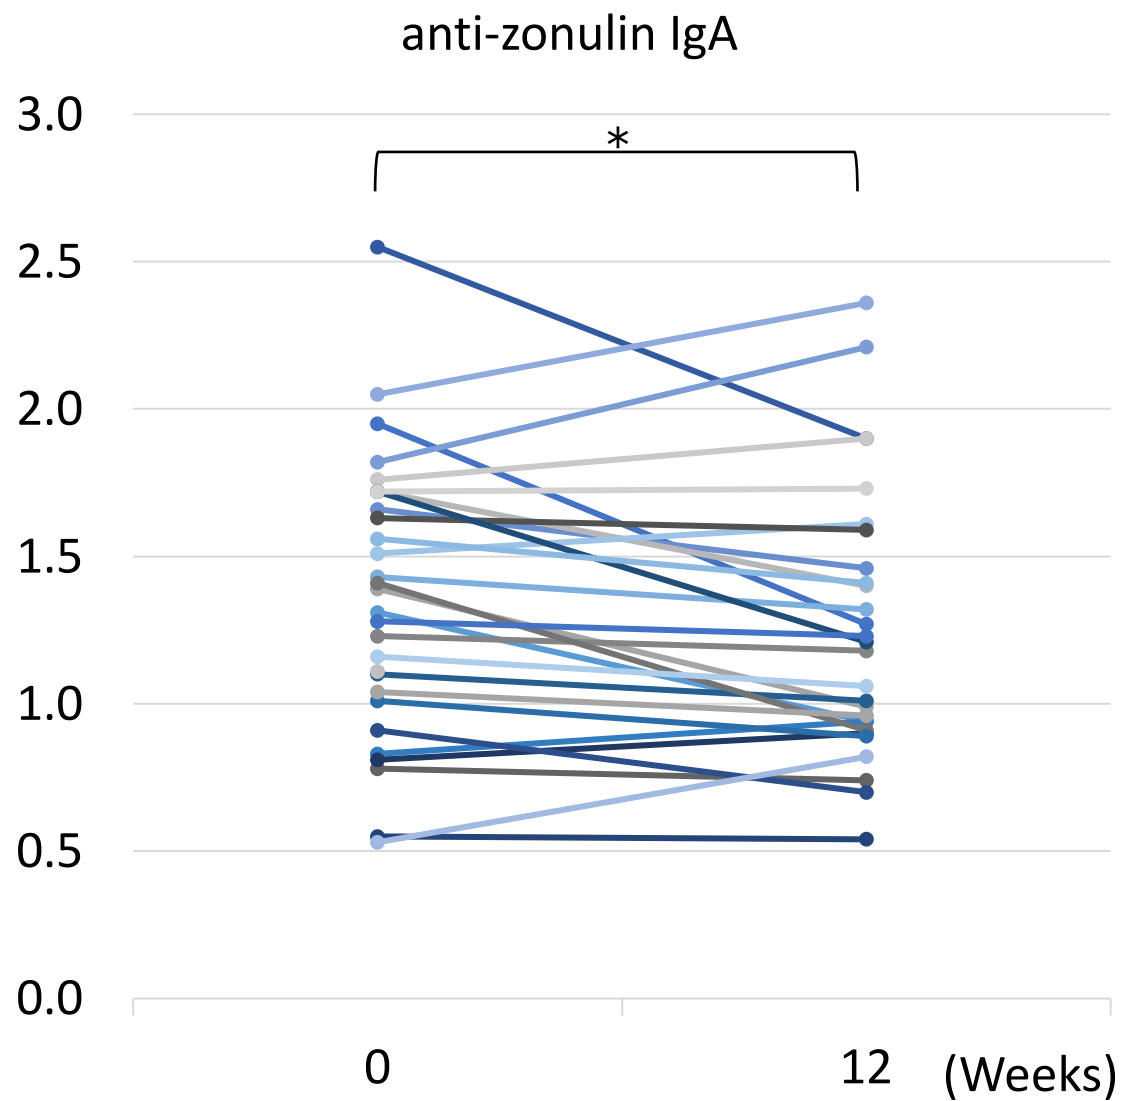

Supplement: Supplementary file 3 [file 1]

EASI total score (max, 72)

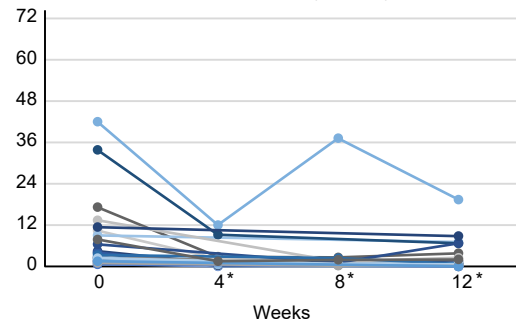

Total IgE (IU/mL)

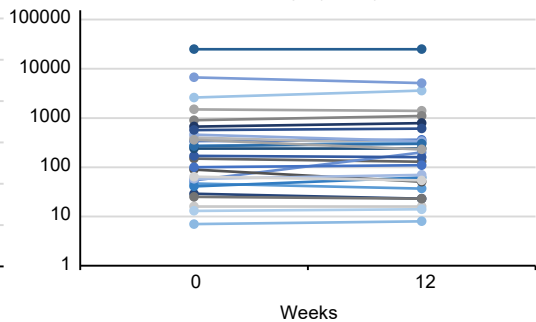

LDH (IU/L)

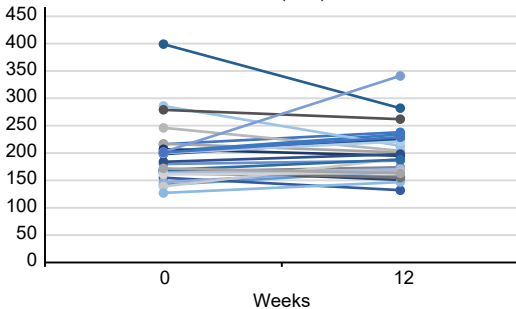Eosino (/ $\mu$ L)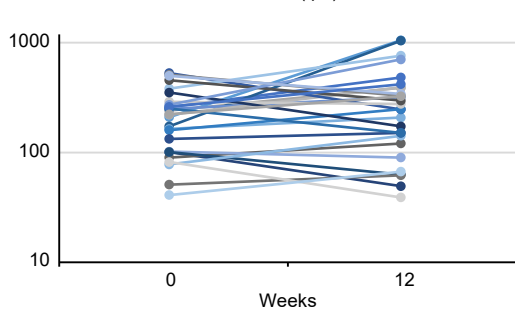

Supplement: Supplementary file 4 [file 1]
